# Supplementary material
Source: PubMed Central journal article supplement (PMC2833376)
Supplement: mmc1.pdf [file mmc1.pdf]

## Mutations in *TPRN* Cause a Progressive Form of Autosomal-Recessive Nonsyndromic Hearing Loss

Yun Li, Esther Pohl, Redouane Boulouiz, Margit Schraders, Gudrun Nürnberg, Majida Charif, Ronald J.C. Admiraal, Simon von Ameln, Ingelore Baessmann, Mostafa Kandil, Joris A. Veltman, Peter Nürnberg, Christian Kubisch, Abdelhamid Barakat, Hannie Kremer, and Bernd Wollnik

Table S1. Genes Located in the Critical Region and Tested by Direct Sequencing

| Gene     | Position                   | No. coding exons |
|----------|----------------------------|------------------|
| OLFM1    | 137967103-137989951        | 7                |
| CI116    | 138387026-138391761        | 3                |
| MRPS2    | 138392483-138396518        | 4                |
| PAEP     | 138453604-138458622        | 7                |
| GLT6D1   | 138515502-138531386        | 4                |
| SOHLH1   | 138585257-138591374        | 7                |
| KCNT1    | 138594031-138684992        | 31               |
| CAMSAP1  | 138700334-138799005        | 17               |
| UBADC1   | 138824816-138853226        | 10               |
| BTBD14A  | 138903264-138942370        | 5                |
| LHX3     | 139088098-139096955        | 6                |
| QSOX2    | 139098182-139137687        | 12               |
| GPSM1    | 139221932-139236287        | 9                |
| DNLZ     | 139256352-139258241        | 3                |
| CARD9    | 139261698-139268133        | 13               |
| SNAPC4   | 139270030-139292889        | 22               |
| PMPCA    | 139305116-139318212        | 13               |
| INPP5E   | 139323075-139334256        | 10               |
| SEC16A   | 139334549-139377507        | 32               |
| EGFL7    | 139557382-139567129        | 8                |
| AGPAT2   | 139567595-139581911        | 6                |
| FAM69B   | 139607024-139619169        | 5                |
| TMEM141  | 139685777-139687768        | 5                |
| C9orf86  | 139702381-139735639        | 15               |
| PHPT1    | 139743256-139745488        | 4                |
| MAMDC4   | 139746819-139755249        | 27               |
| EDF1     | 139757233-139760738        | 4                |
| TRAF2    | 139780965-139821066        | 10               |
| FBXW5    | 139834888-139839173        | 8                |
| C9orf141 | not listed in UCSC anymore | 4                |
| PTGDS    | 139871956-139876193        | 6                |
| C9orf142 | 139886870-139888427        | 7                |
| CLIC3    | 139889060-139891024        | 6                |
| ABCA2    | 139901686-139922740        | 49               |
| C9orf139 | 139921916-139931234        | 2                |
| FUT7     | 139924626-139927292        | 2                |

|                       |                     |    |
|-----------------------|---------------------|----|
| <b>NPDC1</b>          | 139933909-139940676 | 9  |
| <b>ENTPD2</b>         | 139942553-139948505 | 9  |
| <b>C9orf140</b>       | 139956581-139965028 | 6  |
| <b>UAP1L1</b>         | 139971953-139978989 | 9  |
| <b>MAN1B1</b>         | 139997800-140003639 | 13 |
| <b>DPP7</b>           | 140004993-140009195 | 13 |
| <b>GRIN1</b>          | 140033609-140063207 | 20 |
| <b>LRRC26</b>         | 140063212-140064491 | 2  |
| <b>SSNA1</b>          | 140083054-140084822 | 3  |
| <b>TPRN (C9orf75)</b> | 140086069-140094980 | 3  |
| <b>TMEM203</b>        | 140098537-140100090 | 1  |
| <b>NDOR1</b>          | 140100119-140113812 | 14 |
| <b>RNF208</b>         | 140114707-140115775 | 1  |
| <b>SLC34A3</b>        | 140126113-140131006 | 12 |
| <b>TUBB2C</b>         | 140135711-140138159 | 4  |
| <b>COBRA1</b>         | 140149759-140167999 | 13 |
| <b>C9orf167</b>       | 140172280-140177092 | 1  |
| <b>NOXA1</b>          | 140317847-140328857 | 14 |
| <b>ENTPD8</b>         | 140328817-140335901 | 9  |
| <b>MRPL41</b>         | 140446309-140447006 | 1  |
| <b>WDR85</b>          | 140449361-140473387 | 11 |
| <b>ZMYND19</b>        | 140476531-140484937 | 6  |
| <b>ARRDC1</b>         | 140500096-140509811 | 8  |
| <b>NP_116326</b>      | 140509785-140513308 | 1  |
| <b>EHMT1</b>          | 140513444-140730576 | 27 |
| <b>CACNA1B</b>        | 140772241-141019075 | 46 |

---

Genomic positions of genes are given in accordance to Human GRCh37 (hg19) of the UCSC Genome Browser.
